# Supplementary material for: Multiple slow relaxation of magnetization in Dy3+ confined in the crystal matrix of rare-earth-calcium silicates with the apatite structure
Source: Royal Society of Chemistry journal article supplement (doi:10.1039/c9dt04248b), 2020-01-01
Supplement: c9dt04248b1.pdf [file c9dt04248b1.pdf]

## Electronic supplementary information

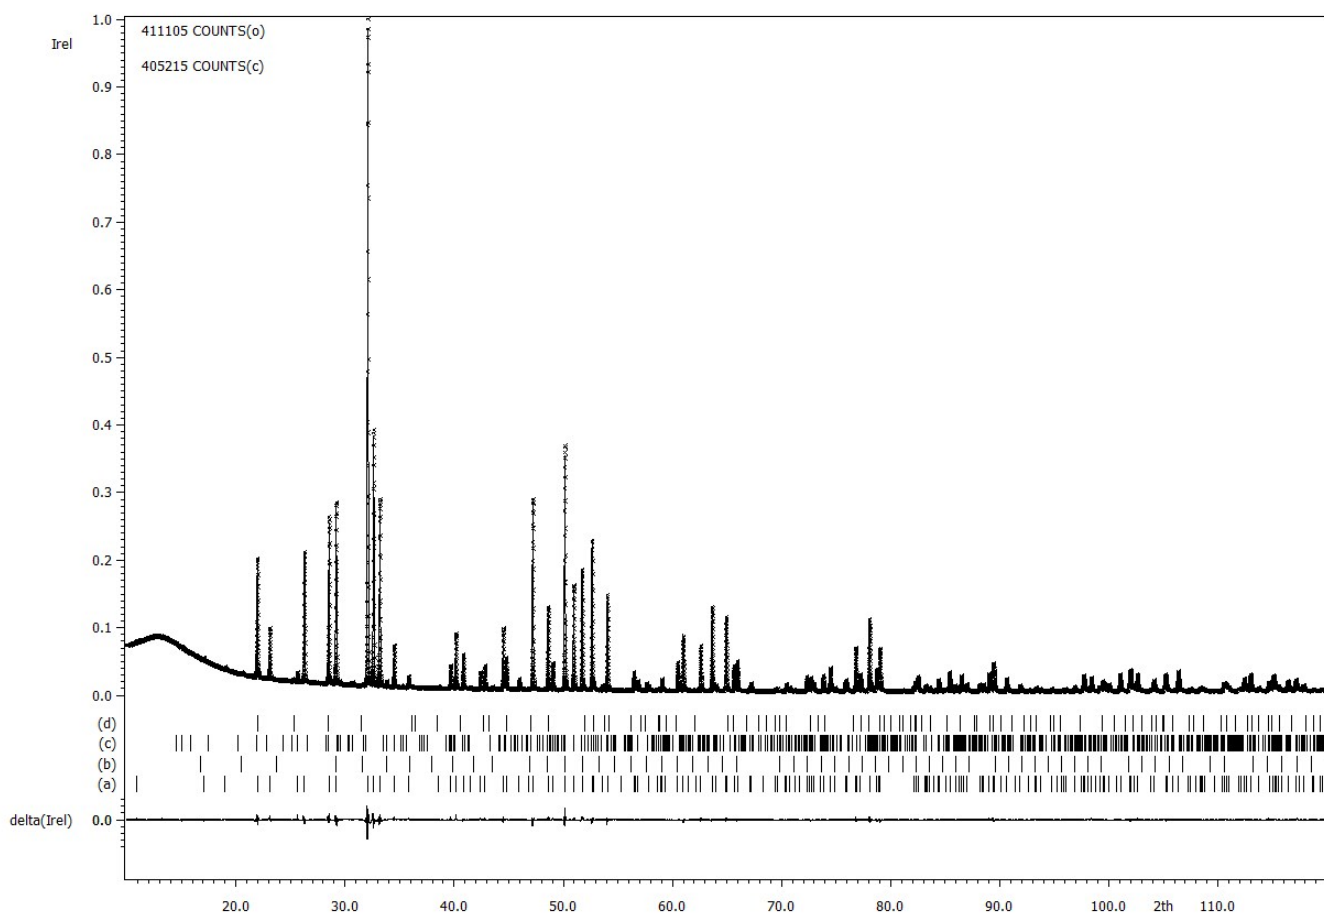

**Figure S1.** X-ray powder diffraction pattern of  $\text{Y}_{7.75}\text{Dy}_{0.25}\text{Ca}_2(\text{SiO}_4)_6\text{O}_2$  (**1**). Observed (crosses), calculated (solid line) and difference (solid line below) plots. Positions of Bragg reflections are shown as strokes underneath. (a) the main apatite phase, (b)  $\text{Y}_2\text{O}_3$  (1.2 wt. %),  $\text{Y}_2\text{SiO}_5$  (1.4 wt. %), cristobalite  $\text{SiO}_2$  (2.4 wt. %).

**Table S1.** Crystal structure refinement data for **1**.

|                                                                     |                                                                                              |
|---------------------------------------------------------------------|----------------------------------------------------------------------------------------------|
| Temperature (K)                                                     | 293 K                                                                                        |
| Wavelength (Å)                                                      | 1.5406                                                                                       |
| Formula (refined)                                                   | $\text{Y}_{7.51}\text{Dy}_{0.24}\text{Ca}_{2.25}(\text{SiO}_4)_6\text{O}_2[\text{H}_\delta]$ |
| Number of reflections                                               | 283                                                                                          |
| Number of data points                                               | 16749                                                                                        |
| Space group                                                         | $\text{P6}_3/\text{m}$                                                                       |
| $a$ (Å)                                                             | 9.3474(2)                                                                                    |
| $c$ (Å)                                                             | 6.7830(1)                                                                                    |
| $V$ (Å <sup>3</sup> )                                               | 513.25(2)                                                                                    |
| $Z$                                                                 | 1                                                                                            |
| $2\theta$ range (deg.)                                              | 10 – 120                                                                                     |
| $R_{\text{wp}}$                                                     | 0.032                                                                                        |
| $R_{\text{all}}$                                                    | 0.014                                                                                        |
| $\Delta F_{\text{max}}, \Delta F_{\text{min}}$ (e Å <sup>-3</sup> ) | 0.31, -0.42                                                                                  |

**Table S2.** Atomic parameters and thermal displacement parameters ( $\text{\AA}^2$ ) in **1**.

| Atom             | Y1 <sup>[a]</sup> , Ca1 | Y2 <sup>[a]</sup> , Ca2 | Si         | O1        | O2        | O3         | O4       |
|------------------|-------------------------|-------------------------|------------|-----------|-----------|------------|----------|
| Site             | 4f                      | 6h                      | 6h         | 6h        | 6h        | 12i        | 4e       |
| SOF              | 0.564(8), 0.436(8)      | 0.916(10), 0.084(10)    | 1          | 1         | 1         | 1          | 1        |
| <i>x</i>         | 1/3                     | 0.00315(20)             | 0.3995(3)  | 0.3183(8) | 0.6002(8) | 0.3392(5)  | 0        |
| <i>y</i>         | 2/3                     | 0.23722(13)             | 0.3721(3)  | 0.4896(8) | 0.4751(8) | 0.2491(5)  | 0        |
| <i>z</i>         | 0.0021(4)               | 1/4                     | 1/4        | 1/4       | 1/4       | 0.0597(5)  | 0.25     |
| $U_{\text{iso}}$ | 0.0117(9)               | 0.0088(8)               | 0.0096(12) | 0.010(2)  | 0.007(2)  | 0.0106(17) | 0.014(3) |

<sup>[a]</sup> Y1, Y2 was refined as a mixture  $\text{Y}_{0.96875}\text{Dy}_{0.03125}$ .

**Table S3.** Selected interatomic distances ( $\text{\AA}$ ) and angles (degrees) in the crystal structure of **1**.

|           |            |    |          |           |    |
|-----------|------------|----|----------|-----------|----|
| Y1,Ca1-O1 | 2.314(6)   | 3x | Si-O1    | 1.621(10) |    |
| Y1,Ca1-O2 | 2.420(6)   | 3x | Si-O2    | 1.627(7)  |    |
| Y1,Ca1-O3 | 2.784(5)   | 3x | Si-O3    | 1.631(4)  | 2x |
| Y2,Ca2-O1 | 2.692(5)   |    | O1-Si-O2 | 113.6(4)  |    |
| Y2,Ca2-O2 | 2.368(11)  |    | O1-Si-O3 | 111.4(3)  | 2x |
| Y2,Ca2-O3 | 2.282(4)   | 2x | O2-Si-O3 | 107.7(3)  | 2x |
| Y2,Ca2-O3 | 2.423(4)   | 2x | O3-Si-O3 | 104.7(3)  |    |
| Y2,Ca2-O4 | 2.2026(15) |    |          |           |    |

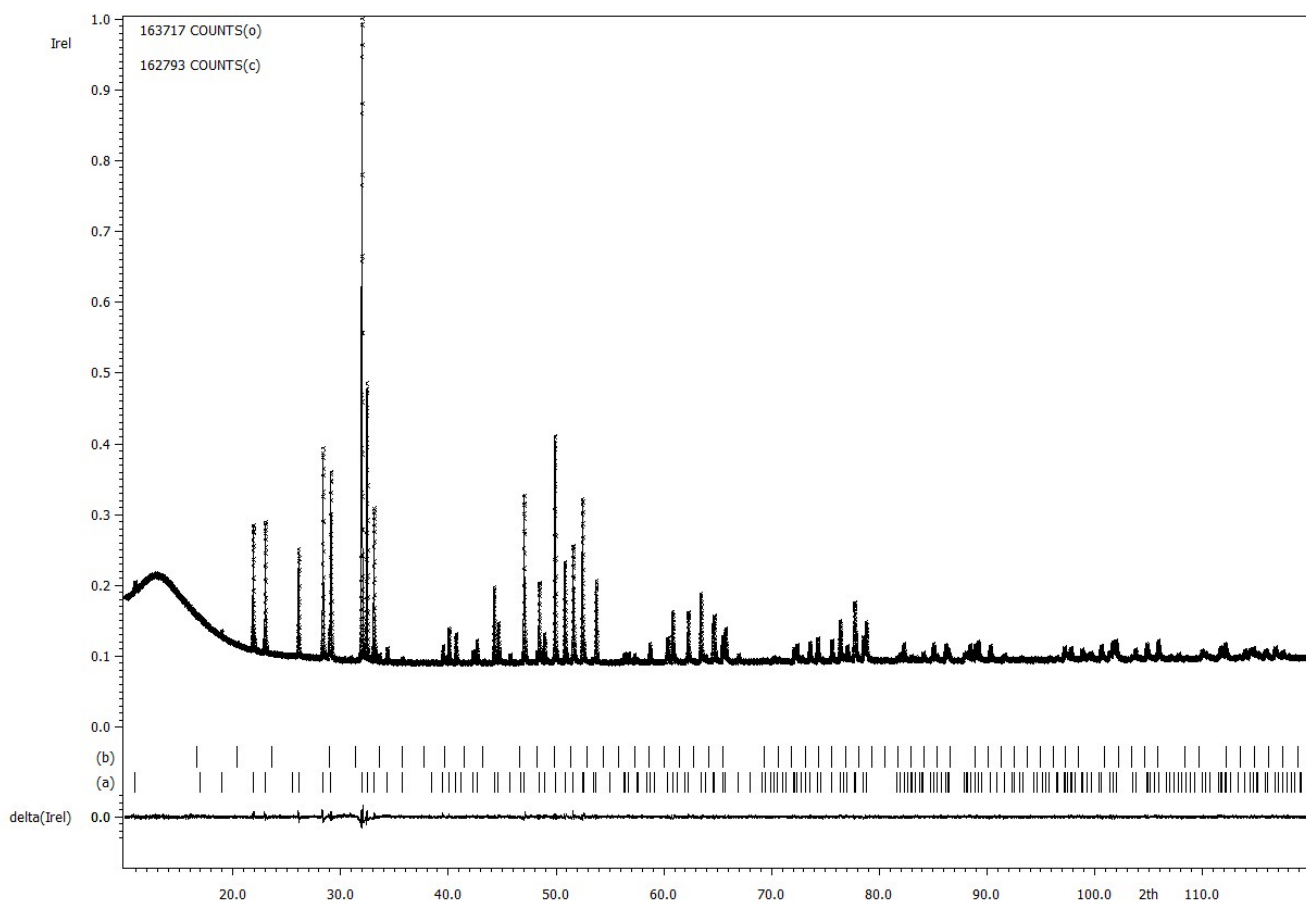

**Figure S2.** X-ray powder diffraction pattern of  $\text{Dy}_8\text{Ca}_2(\text{SiO}_4)_6\text{O}_2$  (**2**). Observed (crosses), calculated (solid line) and difference (solid line below) plots. Positions of Bragg reflections are shown as strokes underneath. (a) the main apatite phase, (b)  $\text{Dy}_2\text{O}_3$  (1.1 wt. %).

**Table S4.** Crystal structure refinement data for **2**.

|                                                                     |                                                              |
|---------------------------------------------------------------------|--------------------------------------------------------------|
| Temperature (K)                                                     | 293 K                                                        |
| Wavelength (Å)                                                      | 1.5406                                                       |
| Formula (refined)                                                   | $\text{Dy}_{8.04}\text{Ca}_{1.96}(\text{SiO}_4)_6\text{O}_2$ |
| Number of reflections                                               | 283                                                          |
| Number of data points                                               | 16749                                                        |
| Space group                                                         | $\text{P6}_3/\text{m}$                                       |
| $a$ (Å)                                                             | 9.3654(2)                                                    |
| $c$ (Å)                                                             | 6.8188(1)                                                    |
| $V$ (Å <sup>3</sup> )                                               | 517.95(2)                                                    |
| $Z$                                                                 | 1                                                            |
| $2\theta$ range (deg.)                                              | 10 – 120                                                     |
| $R_{\text{wp}}$                                                     | 0.011                                                        |
| $R_{\text{all}}$                                                    | 0.020                                                        |
| $\Delta F_{\text{max}}, \Delta F_{\text{min}}$ (e Å <sup>-3</sup> ) | 0.48, -0.63                                                  |

**Table S5.** Atomic parameters and thermal displacement parameters ( $\text{\AA}^2$ ) in **2**.

| Atom             | Dy1, Ca1           | Dy2, Ca2             | Si         | O1         | O2         | O3        | O4       |
|------------------|--------------------|----------------------|------------|------------|------------|-----------|----------|
| Site             | 4f                 | 6h                   | 6h         | 6h         | 6h         | 12i       | 4e       |
| SOF              | 0.594(7), 0.406(7) | 0.944(10), 0.056(10) | 1          | 1          | 1          | 1         | 1        |
| <i>x</i>         | 1/3                | 0.0054(3)            | 0.3994(6)  | 0.3176(11) | 0.6018(11) | 0.3377(7) | 0        |
| <i>y</i>         | 2/3                | 0.23865(16)          | 0.3716(6)  | 0.4889(11) | 0.4747(10) | 0.2487(7) | 0        |
| <i>z</i>         | -0.0002(7)         | 1/4                  | 1/4        | 1/4        | 1/4        | 0.0609(7) | 0.25     |
| $U_{\text{iso}}$ | 0.0101(9)          | 0.0069(6)            | 0.0078(18) | 0.009(4)   | 0.003(3)   | 0.006(3)  | 0.008(4) |

**Table S6.** Selected interatomic distances ( $\text{\AA}$ ) and angles (degrees) in the crystal structure of **2**.

|            |            |    |          |           |    |
|------------|------------|----|----------|-----------|----|
| Dy1,Ca1-O1 | 2.336(9)   | 3x | Si-O1    | 1.623(15) |    |
| Dy1,Ca1-O2 | 2.414(9)   | 3x | Si-O2    | 1.642(10) |    |
| Dy1,Ca1-O3 | 2.802      | 3x | Si-O3    | 1.630(6)  | 2x |
| Dy2,Ca2-O1 | 2.682(8)   |    | O1-Si-O2 | 113.5(6)  |    |
| Dy2,Ca2-O2 | 2.372(15)  |    | O1-Si-O3 | 110.9(4)  | 2x |
| Dy2,Ca2-O3 | 2.289(5)   | 2x | O2-Si-O3 | 108.2(4)  | 2x |
| Dy2,Ca2-O3 | 2.440(6)   | 2x | O3-Si-O3 | 104.6(4)  |    |
| Dy2,Ca2-O4 | 2.2103(19) |    |          |           |    |

**Table S7.** Crystal field parameters (in Wybourne notation) derived in the program CONCORD for Dy<sup>3+</sup> using experimental atomic coordinates of the coordination polyhedrons of Dy1 and Dy2 sites (from Table S5). Partial charges on the silicate oxygen atoms and on the intrachannel oxygen atom are -0.5 and -1.0 respectively (adjusted to fit the  $\chi T(T)$  dependence for 2).

| Parameter         | Value (cm <sup>-1</sup> )                     |                                               |                                                  |
|-------------------|-----------------------------------------------|-----------------------------------------------|--------------------------------------------------|
|                   | Dy1<br>( $a \rightarrow x, c \rightarrow z$ ) | Dy2<br>( $a \rightarrow x, c \rightarrow z$ ) | Dy2<br>( $z$ axis along easy magnetization axis) |
| B <sub>20</sub>   | 701.38363                                     | -426.97211                                    | 993.34326                                        |
| B <sub>22</sub>   |                                               | -450.63672                                    | 56.914996                                        |
| B <sub>40</sub>   | -157.63795                                    | 157.89317                                     | 294.91316                                        |
| B <sub>42</sub>   |                                               | 10.477190                                     | -48.373936                                       |
| B <sub>43</sub>   | -54.565652                                    |                                               |                                                  |
| B <sub>44</sub>   |                                               | -131.48428                                    | 8.6605777                                        |
| B <sub>60</sub>   | -19.835861                                    | -17.388239                                    | 41.718889                                        |
| B <sub>62</sub>   |                                               | -22.479997                                    | -8.5295564                                       |
| B <sub>63</sub>   | -9.0345006                                    |                                               |                                                  |
| B <sub>64</sub>   |                                               | 5.9183550                                     | 6.4517547                                        |
| B <sub>66</sub>   | 1.9031082                                     | 14.562523                                     | 5.9352741                                        |
| B <sub>21</sub>   |                                               |                                               |                                                  |
| B <sub>41</sub>   |                                               |                                               |                                                  |
| B <sub>61</sub>   |                                               |                                               |                                                  |
| B <sub>65</sub>   |                                               |                                               |                                                  |
| B <sub>21</sub> ' |                                               |                                               | -84.160426                                       |
| B <sub>22</sub> ' |                                               | -457.67948                                    |                                                  |
| B <sub>41</sub> ' |                                               |                                               | 126.32885                                        |
| B <sub>42</sub> ' |                                               | 161.23726                                     |                                                  |
| B <sub>43</sub> ' | 72.107571                                     |                                               | -47.108550                                       |
| B <sub>44</sub> ' |                                               | 90.664794                                     |                                                  |
| B <sub>61</sub> ' |                                               |                                               | -0.83957308                                      |
| B <sub>62</sub> ' |                                               | -12.005122                                    |                                                  |
| B <sub>63</sub> ' | 20.817456                                     |                                               | 3.5214506                                        |
| B <sub>64</sub> ' |                                               | -8.0281853                                    |                                                  |
| B <sub>65</sub> ' |                                               |                                               | -10.676067                                       |
| B <sub>66</sub> ' | 7.5849117                                     | -5.8940102                                    |                                                  |

**Table S8.** Modeling with the program PHI using crystal field parameters listed in Table S7. The KDs of the ground multiplet  ${}^6\text{H}_{15/2}$  are shown only.

Dy1

| Energy (cm <sup>-1</sup> ) | $M_J$ (%)    | $g_z$   | $g_x$  | $g_y$   | Probability $M_J \rightarrow -M_J$ |
|----------------------------|--------------|---------|--------|---------|------------------------------------|
| 0                          | 15/2 (99.97) | 19.9976 | 0      | 0       |                                    |
| 64.0008                    | 13/2 (99.85) | 17.2988 | 0.0001 | 0.0001  | 0.4501E-08                         |
| 135.343                    | 11/2 (99.64) | 14.5908 | 0.0001 | 0.0001  | 0.1192E-05                         |
| 204.748                    | 9/2 (99.35)  | 11.8897 | 0      | 0       | 0.1182E-04                         |
| 266.071                    | 7/2 (98.99)  | 9.2065  | 0.0890 | 0.0890  | 0.2549E-02                         |
| 315.214                    | 5/2 (98.23)  | 6.5484  | 0.1024 | 0.1024  | 0.5682E-01                         |
| 349.429                    | 3/2 (94.50)  | 4.0055  | 0      | 0       | 0.2511E+00                         |
| 366.971                    | 1/2 (96.25)  | 10.6436 | 1.3030 | 10.6436 | 0.1819E+02                         |

Dy2

| Energy (cm <sup>-1</sup> ) | $M_J$ (%)    | $g_z$   | $g_x$  | $g_y$  | Probability $M_J \rightarrow -M_J$ |
|----------------------------|--------------|---------|--------|--------|------------------------------------|
| 0                          | 15/2 (100)   | 19.9994 | 0      | 0      |                                    |
| 167.926                    | 13/2 (99.87) | 17.2872 | 0      | 0      | 0.7178E-03                         |
| 298.260                    | 11/2 (99.78) | 14.6456 | 0.0009 | 0.0010 | 0.2984E-06                         |
| 392.941                    | 9/2 (98.49)  | 12.0443 | 0.0035 | 0.0059 | 0.2841E+00                         |
| 456.651                    | 7/2 (94.07)  | 9.1918  | 0.9112 | 1.2725 | 0.1201E+00                         |
| 493.969                    | 5/2 (68.07)  | 7.3280  | 4.3505 | 6.9856 | 0.8801E+01                         |
|                            | 1/2 (22.07)  |         |        |        |                                    |
| 526.148                    | 3/2 (56.56)  | 14.0515 | 0.9259 | 2.0046 | 0.1735E+02                         |
|                            | -1/2 (14.91) |         |        |        |                                    |
|                            | -5/2 (24.58) |         |        |        |                                    |
| 564.749                    | 1/2 (62.31)  | 18.9301 | 0.0319 | 0.0653 | 0.3064E+02                         |
|                            | -3/2 (30.75) |         |        |        |                                    |

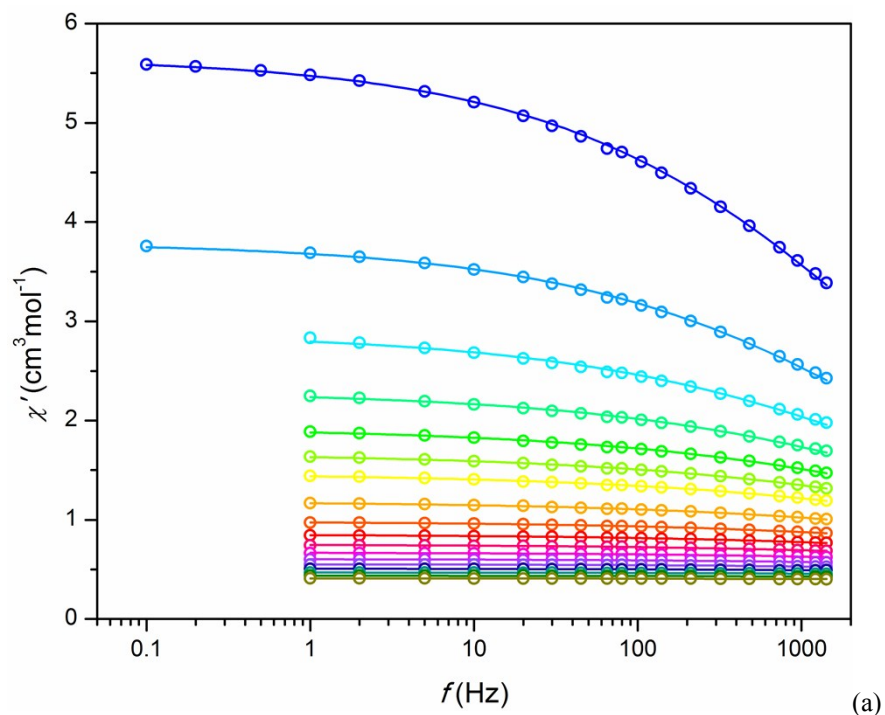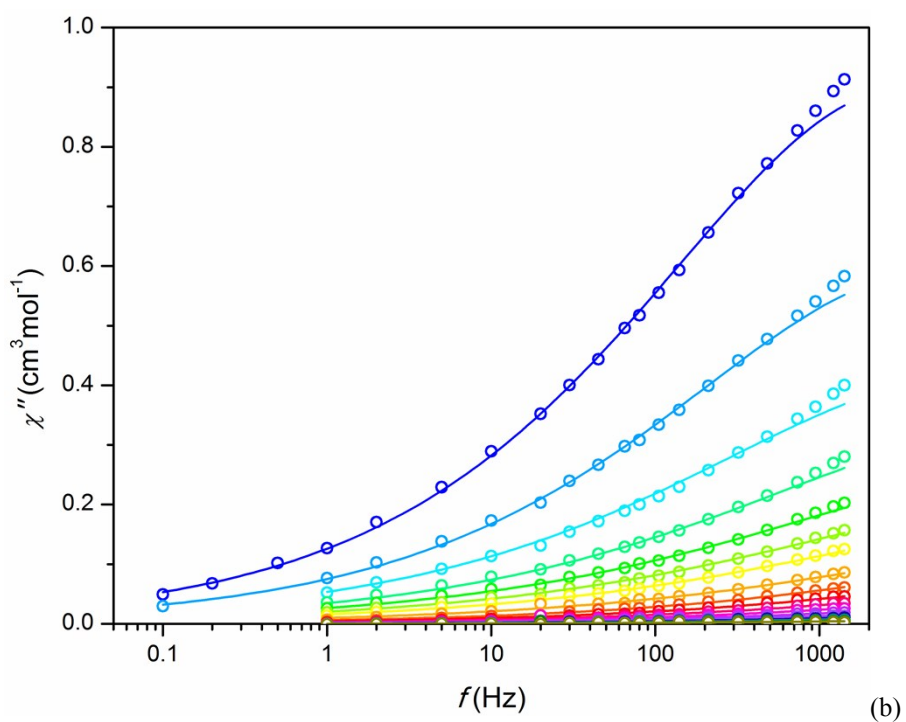

**Figure S3.** Frequency dependence of ac susceptibility per mol of Dy for **1** at different temperatures under a zero field. (a) – in-phase susceptibility  $\chi'$ , (b) – out-of-phase susceptibility  $\chi''$ . Symbols – experimental points, lines – fitting. Color designation: blue – green – red – navy – dark-yellow,  $T = 2 - 8$  K (step 1 K),  $T = 10 - 30$  K (step 2 K), respectively.

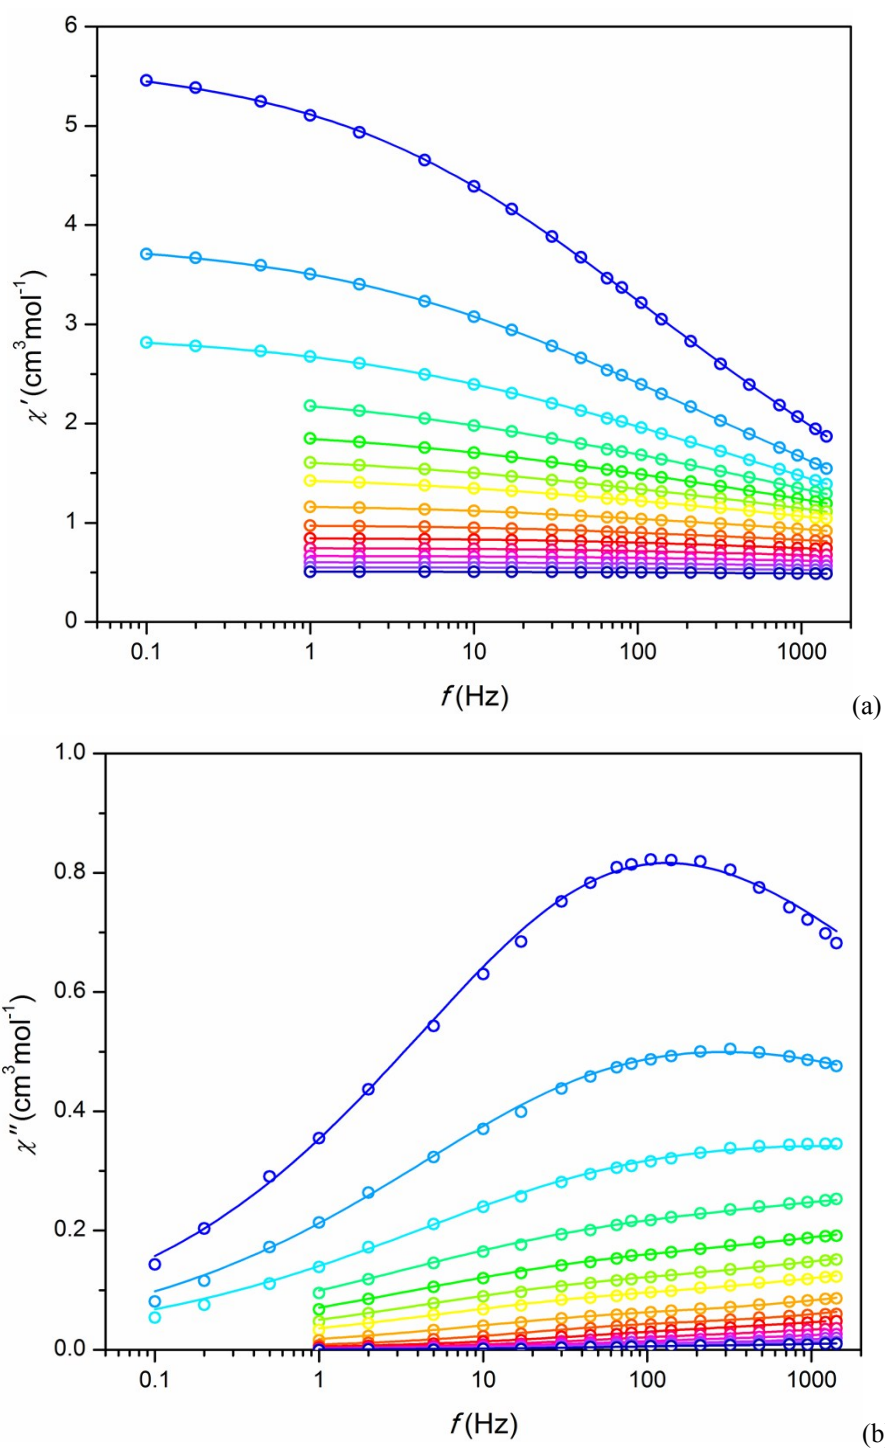

**Figure S4.** Frequency dependence of ac susceptibility per mol of Dy for **1** at different temperatures under a field of 0.4 kOe. (a) – in-phase susceptibility  $\chi'$ , (b) – out-of-phase susceptibility  $\chi''$ . Symbols – experimental points, lines – fitting. Color designation: blue – green – red – navy,  $T = 2 - 8$  K (step 1 K),  $T = 10 - 24$  K (step 2 K), respectively.



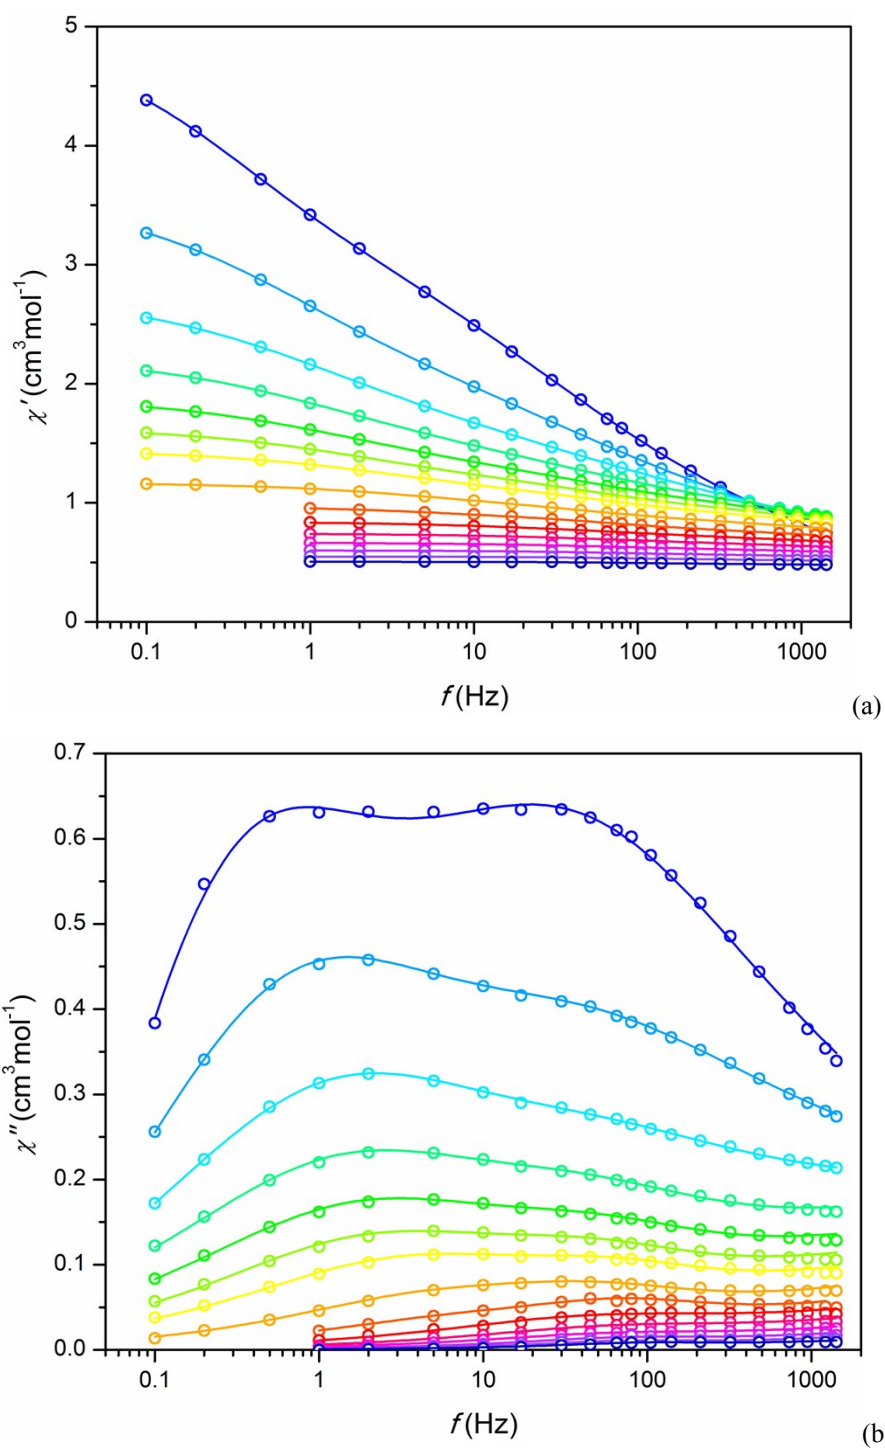

**Figure S5.** Frequency dependence of ac susceptibility per mol of Dy for **1** at different temperatures under a field of 1.5 kOe. (a) – in-phase susceptibility  $\chi'$ , (b) – out-of-phase susceptibility  $\chi''$ . Symbols – experimental points, lines – fitting. Color designation: blue – green – red – navy,  $T = 2 - 8$  K (step 1 K),  $T = 10 - 24$  K (step 2 K), respectively.

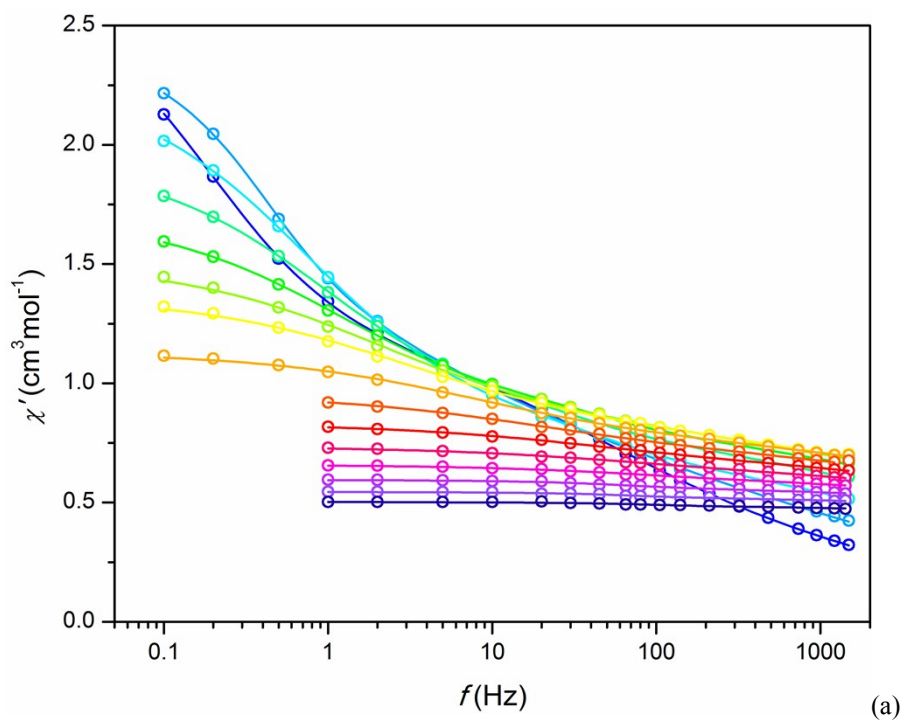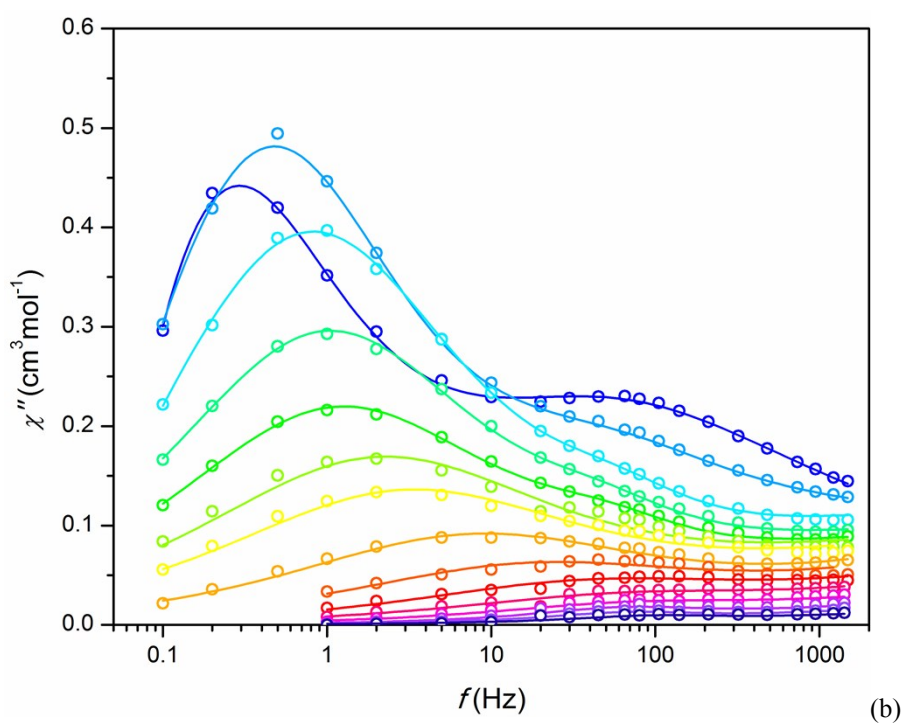

**Figure S6.** Frequency dependence of ac susceptibility per mol of Dy for **1** at different temperatures under a field of 4 kOe. (a) – in-phase susceptibility  $\chi'$ , (b) – out-of-phase susceptibility  $\chi''$ . Symbols – experimental points, lines – fitting. Color designation: blue – green – red – navy,  $T = 2 - 8$  K (step 1 K),  $T = 10 - 24$  K (step 2 K), respectively.

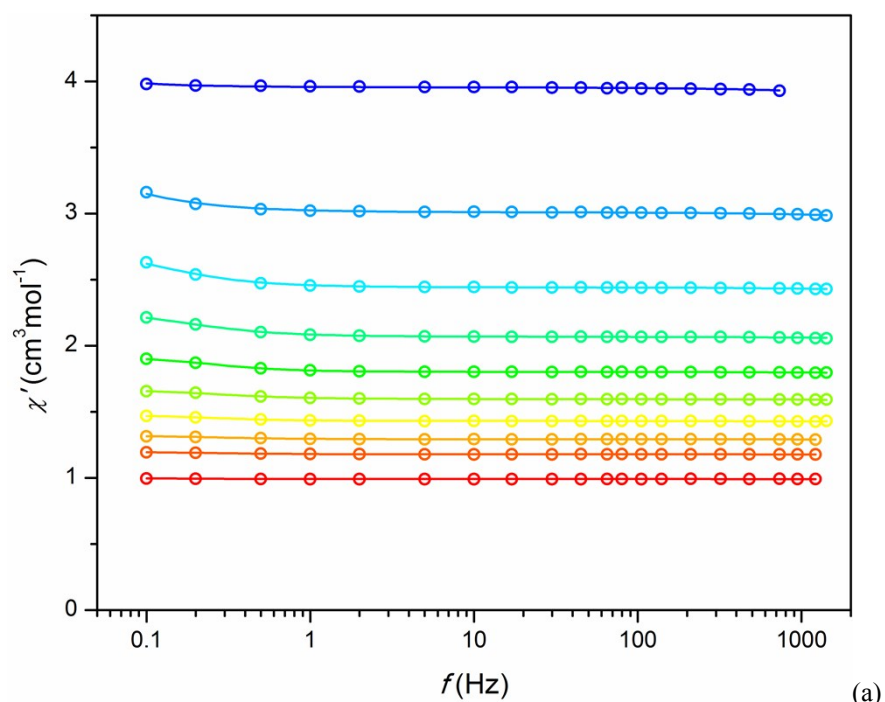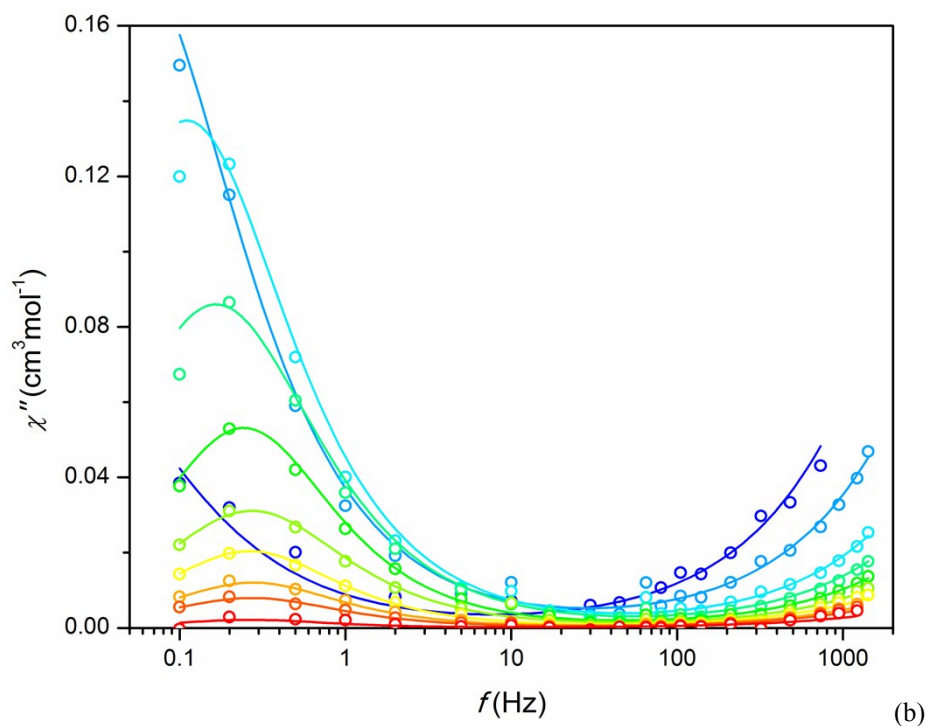

**Figure S7.** Frequency dependence of ac susceptibility per mol of Dy for **2** at different temperatures under a field of 1.5 kOe. (a) – in-phase susceptibility  $\chi'$ , (b) – out-of-phase susceptibility  $\chi''$ . Symbols – experimental points, lines – fitting. Color designation: blue – green – red,  $T = 2 - 10$  K (step 1 K), and  $T = 12$  K, respectively. Values of  $\chi_0$  (derived from dc magnetization measurements as differential susceptibilities) taken for the fitting: 4.310, 3.336, 2.658, 2.184 for  $T = 2, 3, 4, 5$  K, respectively.

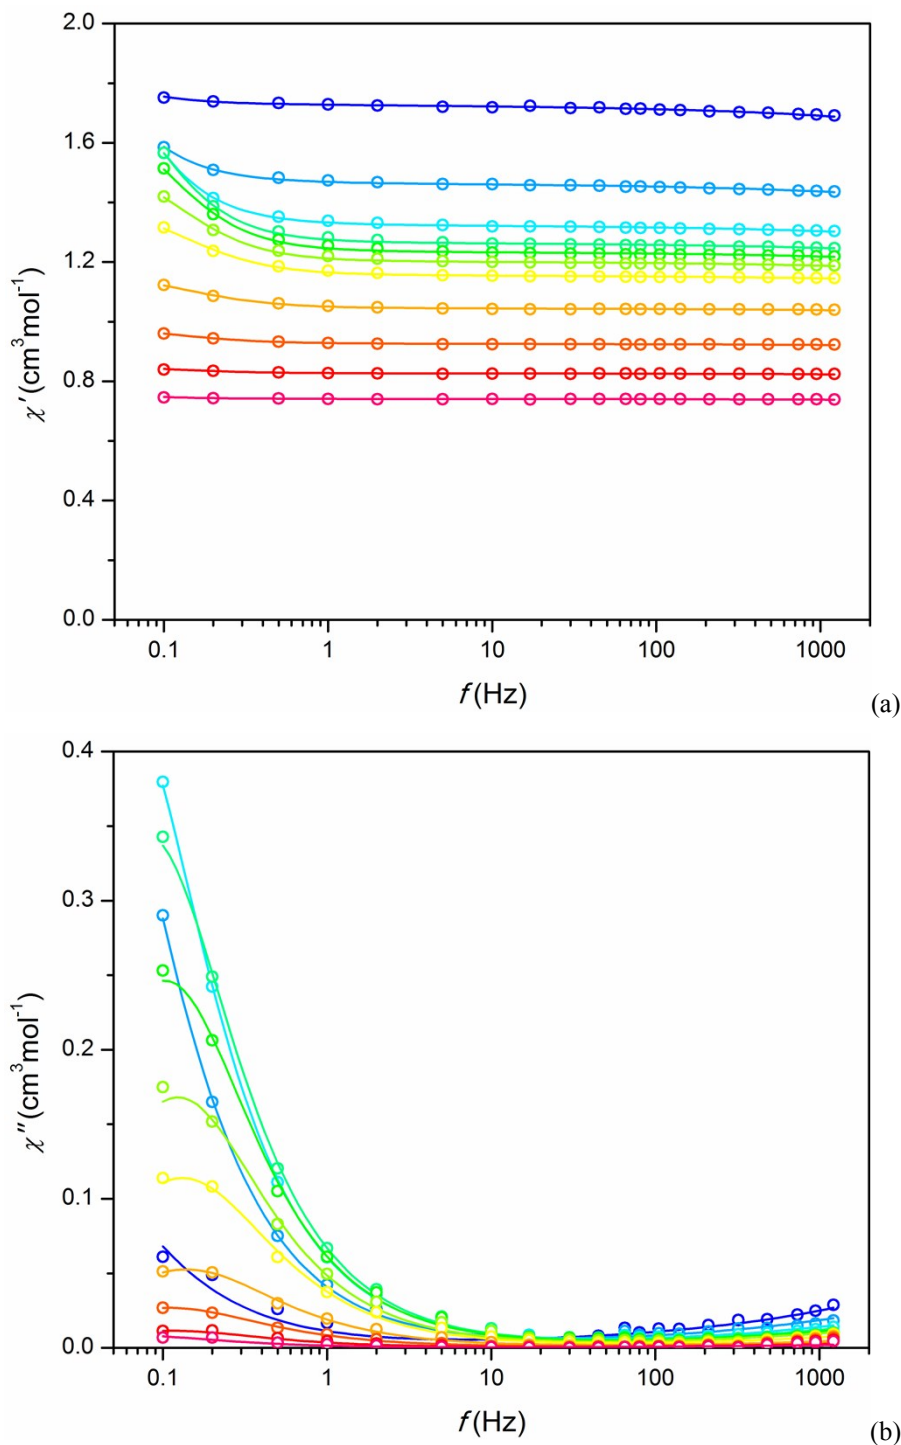

**Figure S8.** Frequency dependence of ac susceptibility per mol of Dy for **2** at different temperatures under a field of 4 kOe. (a) – in-phase susceptibility  $\chi'$ , (b) – out-of-phase susceptibility  $\chi''$ . Symbols – experimental points, lines – fitting. Color designation: blue – green – carmine-red,  $T = 2 - 8$  K (step 1 K),  $T = 10 - 16$  K (step 2 K), respectively. Values of  $\chi_0$  (derived from dc magnetization measurements as differential susceptibilities) taken for the fitting: 2.560, 2.465, 2.202, 1.922, 1.695, 1.500, 1.353, 1.117, for  $T = 2, 3, 4, 5, 6, 7, 8, 10$  K, respectively.

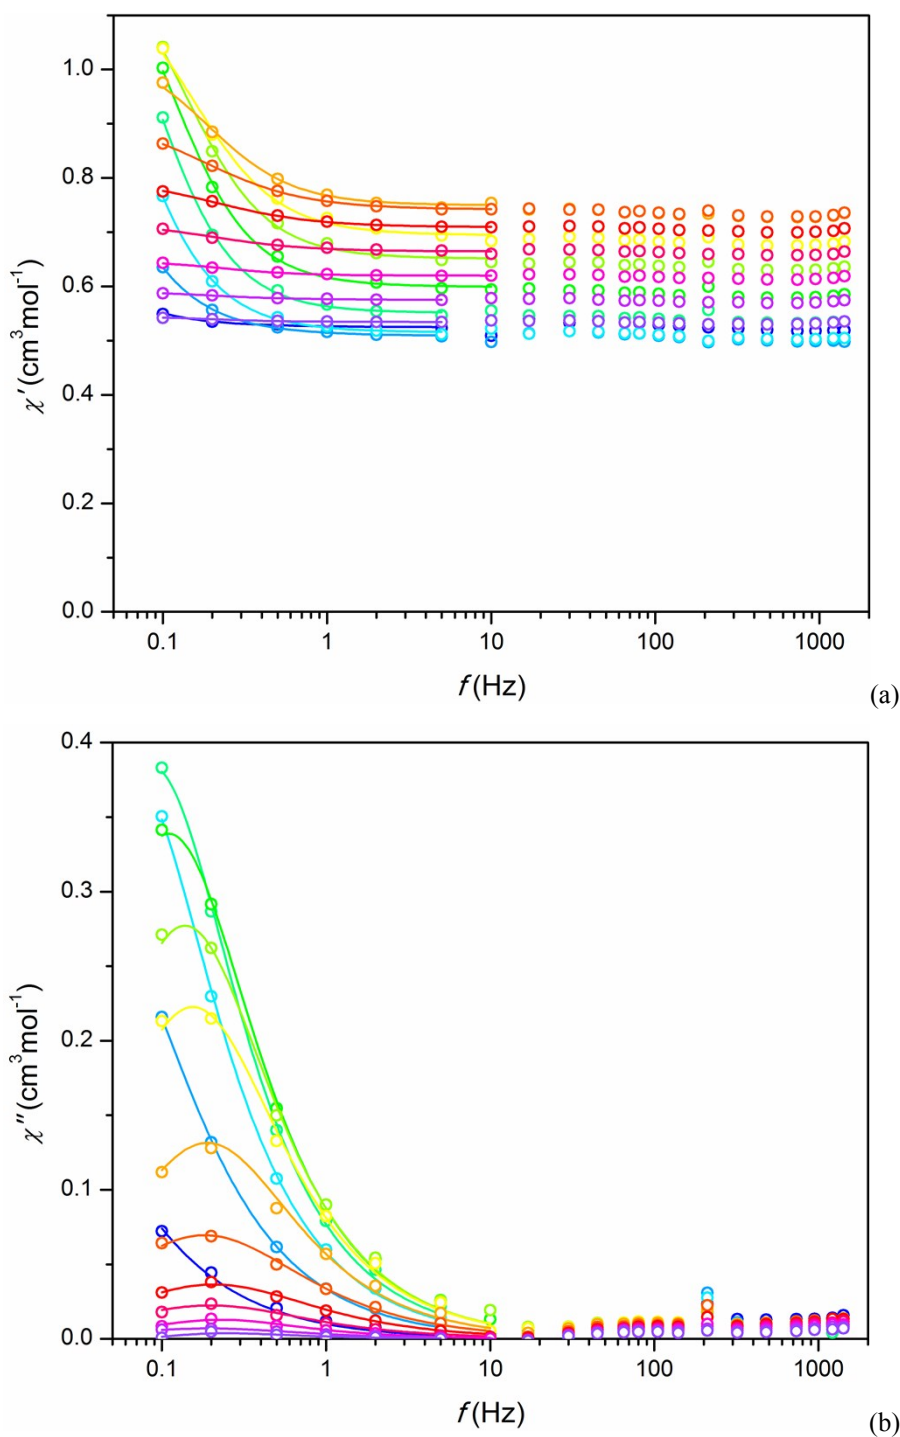

**Figure S9.** Frequency dependence of ac susceptibility per mol of Dy for **2** at different temperatures under a field of 8 kOe. (a) – in-phase susceptibility  $\chi'$ , (b) – out-of-phase susceptibility  $\chi''$ . Symbols – experimental points, lines – fitting. Color designation: blue – green – red – violet,  $T = 2 - 8$  K (step 1 K),  $T = 10 - 22$  K (step 2 K), respectively. Values of  $\chi_0$  (derived from dc magnetization measurements as differential susceptibilities) taken for the fitting: 0.906, 1.170, 1.303, 1.314, 1.277, 1.199, 1.140, 0.998, 0.875, 0.778, 0.696, for  $T = 2, 3, 4, 5, 6, 7, 8, 10, 12, 14, 16$  K, respectively.
